# Supplementary material for: Predicted deleterious mutations reveal the genomic mechanisms underlying fitness variation in a lekking bird
Source: Research Square preprint supplement (doi:10.21203/rs.3.rs-5579350/v1), 2024-12-11
Supplement: Supplementary file 1 [file 442d3e762d50ec31812f6826.pdf]

1 **Supplementary information for:**

2 **Predicted deleterious mutations reveal the genomic mechanisms**  
3 **underlying fitness variation in a lekking bird**

4  
5 Rebecca S. Chen, Carl D. Soulsbury, Kosmas Hench, Kees van Oers, Joseph I. Hoffman

6  
7 Correspondence: Rebecca S. Chen, rebecca.chen@uni-bielefeld.de, Department of  
8 Evolutionary Population Genetics, Faculty of Biology, Bielefeld University, Bielefeld,  
9 Germany

10

|                                             |                    |
|---------------------------------------------|--------------------|
| <b>Supplementary results and discussion</b> | <b>Page 2</b>      |
| <b>Supplementary methods</b>                | <b>Pages 3-6</b>   |
| <b>Supplementary figures</b>                | <b>Pages 7-8</b>   |
| <b>Supplementary tables</b>                 | <b>Pages 9 -18</b> |
| <b>References</b>                           | <b>Pages 19-21</b> |

11

12

## 13 **Supplementary results and discussion**

14

### 15 **Population and relatedness structure**

16 To contextualise our mutation load analyses, we first characterised the genetic structure of the  
17 black grouse population and tested for the presence of close kin both within and among the  
18 lekking sites (Supplementary Fig. 1a). Genetic differentiation was overall rather weak, with  
19 no pairwise comparisons of lekking sites yielding  $F_{ST}$  values differing significantly from zero  
20 (Supplementary Table 9). However, there was a hint of population structure along a west-east  
21 axis, with KUM and NYR being the most differentiated lekking sites (Supplementary Fig. 1b).  
22 These results are consistent with previous studies revealing weak to moderate population  
23 structure among black grouse leks<sup>1-3</sup> and reflect the interplay between female dispersal and  
24 male site fidelity<sup>1,4,5</sup>. Accordingly, no significant differences were found among the lekking  
25 sites in individual mutation loads (Supplementary Table 8).

26 To characterise the relatedness structure of our dataset, we calculated R0, R1 and KING-robust  
27 kinship values for all pairwise combinations of individuals and visualised the results by plotting  
28 R1 against KING-robust kinship (Supplementary Fig. 1c). Pairs of individuals were assigned  
29 to specific relatedness categories by computing Z scores and comparing these with the  
30 inference criteria of Manichaikul et al.<sup>6</sup>. We identified a total of 466 pairs of close kin among  
31 17,949 pairwise comparisons (2.6%) comprising 27 full siblings (5.8%), 60 parent-offspring  
32 pairs (12.9%), 176 second-degree relatives (37.8%) and 203 third-degree relatives (43.6%).  
33 The proportion of relatives sampled at the same lekking site was highest for full siblings and  
34 lowest for third-degree relatives (Supplementary Fig. 1d). The presence of close male kin on  
35 black grouse leks has been described previously<sup>7</sup> and arises due to strong male philopatry<sup>1,4,5</sup>.  
36 While the risk of inbreeding is reduced by female-biased dispersal<sup>8</sup>, consanguineous matings  
37 may still occur as older females have a greater chance of mating with philopatric male kin<sup>9</sup>.

38

## 39 **Supplementary methods**

40

### 41 **Reference genome**

42 For this study, we scaffolded a black grouse reference genome assembled by the 10K Bird  
43 Project (B10K)<sup>10,11</sup>. B10K constructed a single-tube long fragment read co-barcoded (stLFR)  
44 library which was subsequently 100bp paired-end sequenced on a DNBseq platform at the  
45 Beijing Genomics Institute (BGI). Raw reads with missing data (>10%), low quality (>40%  
46 bases with Phred score  $\leq 10$ ) or below expected insert sizes were excluded and PCR duplicates  
47 were filtered out using SOAPfilter2 v2.2<sup>12</sup>. GapCloser v1.12<sup>13</sup> was used to close gaps within  
48 scaffolds. The resulting B10K assembly had a total length of 1,002,957,384 bp and consisted  
49 of 26,930 scaffolds with an N50 of 5,658,217 bp (for details, see Supplementary Table 10).

50 To improve contiguity, we scaffolded the B10K assembly using HiRise together with Cantata  
51 Bio. They used 200 ml of blood to prepare an Omni-C library for genome scaffolding with  
52 HiRise. First, chromatin in the nucleus was fixed with formaldehyde<sup>14</sup>. DNase I was then used  
53 to extract and digest the chromatin, after which the ends were repaired and ligated to a  
54 biotinylated bridge adapter. The DNA was subsequently purified and unligated fragments were  
55 discarded. A library was then generated using NEBNext Ultra enzymes and Illumina-  
56 compatible adapters. Using streptavidin beads, biotin-containing fragments were isolated, and  
57 the sequences were duplicated in a polymerase chain reaction (PCR). Prior to deep sequencing,  
58 the B10K assembly was used to quality check the OmniC library. Finally, the sequencing was  
59 performed using an Illumina HiSeqX platform with a target coverage of 30X and the resulting  
60 reads were quality filtered ( $MQ > 50$ ) and used to scaffold both pseudo-haplotypes with Cantata  
61 Bio's HiRise software<sup>14</sup>. The contiguity of the resulting reference genome was considerably  
62 improved, with the scaffold N50 increasing over ten-fold to 69,550,540 (Supplementary Table  
63 10). Lastly, we identified the scaffold corresponding to the Z chromosome by aligning the  
64 chicken Z chromosome (NCBI RefSeq assembly GCF\_016699485.2) to the black grouse  
65 reference genome using BLAST v2.12.0<sup>15</sup>. We identified a long scaffold that showed 83%  
66 identity to the chicken Z chromosome, which we assigned as the black grouse Z chromosome.

67

68

69

## 70 **Genome annotation**

71 To annotate the scaffolded reference genome, we generated transcriptomic data from an 11–14  
72 day old black grouse embryo obtained from a captive breeding facility in the Netherlands. Total  
73 RNA was extracted from a mixture of randomly selected embryo sections using the Qiagen  
74 RNeasy Plus Kit. The extract was treated with DNase and the RNA was cleaned using AMPure  
75 beads and the QIAGEN FastSelect HMR RNA depletion kit. The library was prepared by  
76 Genewiz Multiomics & Synthesis Solutions using the NEBNext Ultra II RNA Library Prep Kit  
77 and sequenced on an Illumina NovaSeq6000 platform with 150 bp paired-end reads.

78 The genome annotation was performed by Cantata Bio using the resulting RNA sequencing  
79 data together with publicly available RNA sequencing data (NCBI SRA Bioproject  
80 SRP006680). Repeat families in the genome were identified *de novo* and classified using  
81 RepeatModeler v2.0.1<sup>16</sup>. The output from RepeatModeler was then used to identify and mask  
82 repeated segments in the genome annotation file using RepeatMasker v4.1.0<sup>17</sup>. Two initial *ab*  
83 *initio* gene models were trained with the coding sequences of the chicken (*Gallus gallus*),  
84 Japanese quail (*Coturnix japonica*), rock ptarmigan (*Lagopus muta*) and wild turkey  
85 (*Meleagris gallopavo*) using AUGUSTUS v2.5.5<sup>18</sup> and SNAP v2006-07-28<sup>19</sup> respectively.  
86 The AUGUSTUS predictions were optimised in six rounds. RNA-Seq reads were aligned to  
87 the reference genome using STAR v2.7<sup>20</sup> and intron hints were generated with the bam2hints  
88 tools within AUGUSTUS. Subsequently, we used MAKER<sup>21</sup>, SNAP and AUGUSTUS (with  
89 intron-exon boundary hints provided from the RNA-Seq data) to predict genes in the repeat-  
90 masked reference genome. To help guide the gene prediction process, Swiss-Prot peptide  
91 sequences from the UniProt database were downloaded and used in combination with the  
92 protein sequences from the avian species described above to generate peptide evidence in the  
93 Maker pipeline. The final gene sets comprised only genes that were predicted by both SNAP  
94 and AUGUSTUS. The quality of the predictions was assessed using AED scores generated for  
95 predicted genes by MAKER. Genes were further characterised for their putative function by  
96 performing a BLAST<sup>15</sup> search of the peptide sequences against the UniProt database. Transfer  
97 RNAs were predicted using tRNAscan-SE v2.05<sup>22</sup>.

98

## 99 **Population structure and relatedness**

100 We used principal component analysis (PCA) to test for population genetic structure. For this  
101 analysis, PLINK v1.90<sup>23</sup> was used to produce a stringently filtered SNP dataset from which the

102 following were excluded (i) strongly linked SNPs, where linkage disequilibrium (LD) was  
103 computed in window sizes of 50 base pairs with shifts of 5 SNPs with a variance inflation  
104 factor threshold of 2 (--indep 50 5 2); (ii) SNPs deviating significantly from Hardy-Weinberg  
105 equilibrium (HWE) with an alpha level of 0.001 (--hwe 0.001); and (iii) SNPs with a minor  
106 allele frequency (MAF) below 0.01 (--maf 0.01). The PCA was implemented using PLINK (-  
107 -pca) and the results were visualized with the R tidyverse package set v1.3.1<sup>24</sup>, including dplyr  
108 v1.1.4 and ggplot2 v3.5.1.

109 Next, we quantified genetic differentiation by calculating  $F_{ST}$  values between each pair of  
110 lekking sites based on the stringently filtered dataset described above.  $F_{ST}$  values were  
111 computed per SNP using VCFtools v0.1.17<sup>25</sup> and then averaged across loci. To test whether  
112 the mean  $F_{ST}$  values were significantly different from zero, we computed 1,000 bootstrap  
113 replicates by resampling the pairwise  $F_{ST}$  values across loci with replacement using the boot  
114 package v.1.3.28<sup>26</sup>. Finally, we calculated the absolute differences between the resampled  
115 mean  $F_{ST}$  values and the mean  $F_{ST}$  of the original data, summed these values and divided them  
116 by the total number of bootstrap replicates to obtain the  $p$ -value, which represents the  
117 probability of observing a mean  $F_{ST}$  different from zero.

118 We used the same stringently filtered dataset to infer patterns of pairwise genomic relatedness  
119 among individuals following the workflow of Humble *et al.*<sup>27</sup>. NgsRelate v2<sup>28</sup> was used to  
120 compute three relatedness indices: KING-robust kinship, R0 and R1<sup>29</sup>. The KING-robust  
121 kinship estimate can be used to distinguish between different levels of relatedness when allele  
122 frequencies are unknown and is robust to population structure<sup>6</sup>. The R0 and R1 statistics  
123 specify whether zero or one copies of an allele are shared, respectively. Different categories of  
124 relatedness are associated with non-overlapping ranges of R1, R0 and KING-robust kinship  
125 values.

126 To allocate pairs of individuals to specific relationship categories, we calculated the relatedness  
127 coefficients  $\hat{p}$ , Z0, Z1 and Z2 using the -genome function in PLINK<sup>23</sup>.  $\hat{p}$  is the overall  
128 proportion of the genome that is identical by descent between any pair of individuals. Z0, Z1  
129 and Z2 are coefficients that estimate the proportion of the genome for which zero, one or two  
130 alleles of a pair of individuals are identical by descent, respectively. We used the method  
131 described in Manichaikul *et al.*<sup>6</sup> to assign relationship categories to each pair of individuals  
132 based on theoretical thresholds of the various relatedness coefficients. Pairs of individuals  
133 were assigned to one of five relatedness categories: parent-offspring, full siblings, second-

134 degree relatives (e.g. half-siblings and grandparents-grandchildren), third-degree relatedness  
135 (e.g. cousins) or unrelated individuals. To allow minor deviations from the theoretical  
136 expectations for certain relationships, we classified pairs of individuals as falling within a given  
137 relatedness category if they were within 0.01 of the respective inference threshold, following  
138 Waples *et al.*<sup>29</sup>. Any pair that did not fall within the theoretical ranges of any category including  
139 this additional margin were classified as “unknown”.

140

141 **Supplementary figures**

142 **Supplementary Fig 1. Genetic and relatedness structure of the black grouse study**  
 143 **population in central Finland.** (a) Geographical locations of the lekking sites, with circle  
 144 sizes being proportional to the number of sampled lekking males (total  $n = 190$ ) as shown in  
 145 the legend. Abbreviations: KUM = Kummunsuo, NYR = Nyrölä, SAA = Saarisuo, LEH =  
 146 Lehtosuo, TEE = Teerisuo; (b) Results of the principal component analysis, with the lekking  
 147 sites colour coded as shown in the legend; (c) R1 coefficients plotted against KING-robust  
 148 kinship coefficients for all individual pairwise comparisons. The colours of the points indicate  
 149 relationship categories inferred by comparing PLINK Z scores with the inference criteria  
 150 derived from Manichaikul *et al.*<sup>6</sup> as shown in the legend; (d) A breakdown of the relatedness  
 151 structure of the population divided into comparisons within and among lekking sites.

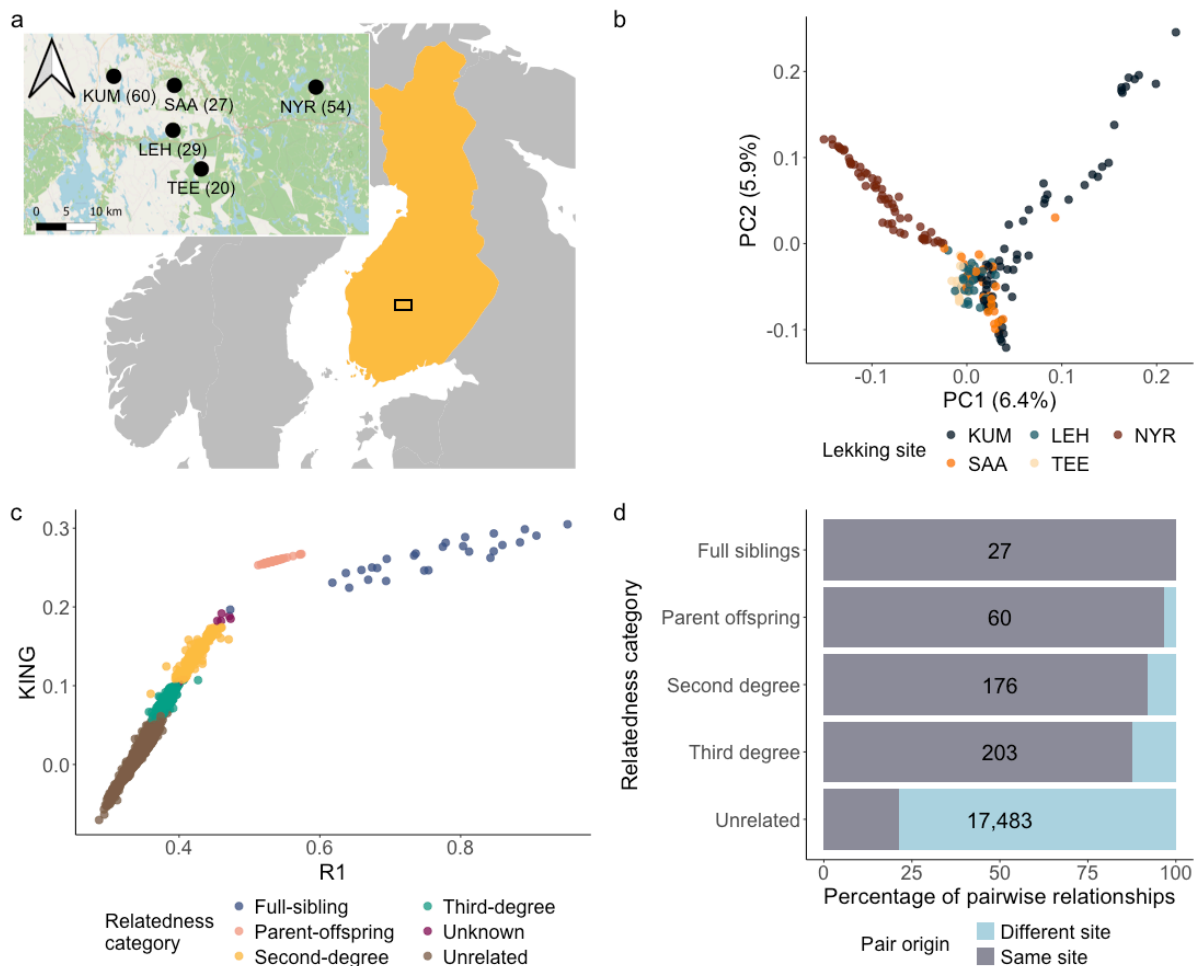

152

153

154 **Supplementary Fig 2. Phylogenetic tree used for the calculation of GERP scores.** Shown  
 155 is an unrooted phylogenetic tree consisting of 74 avian species that was used for calculating  
 156 GERP scores. Different avian clades are colour-coded as shown in the legend.

157

158

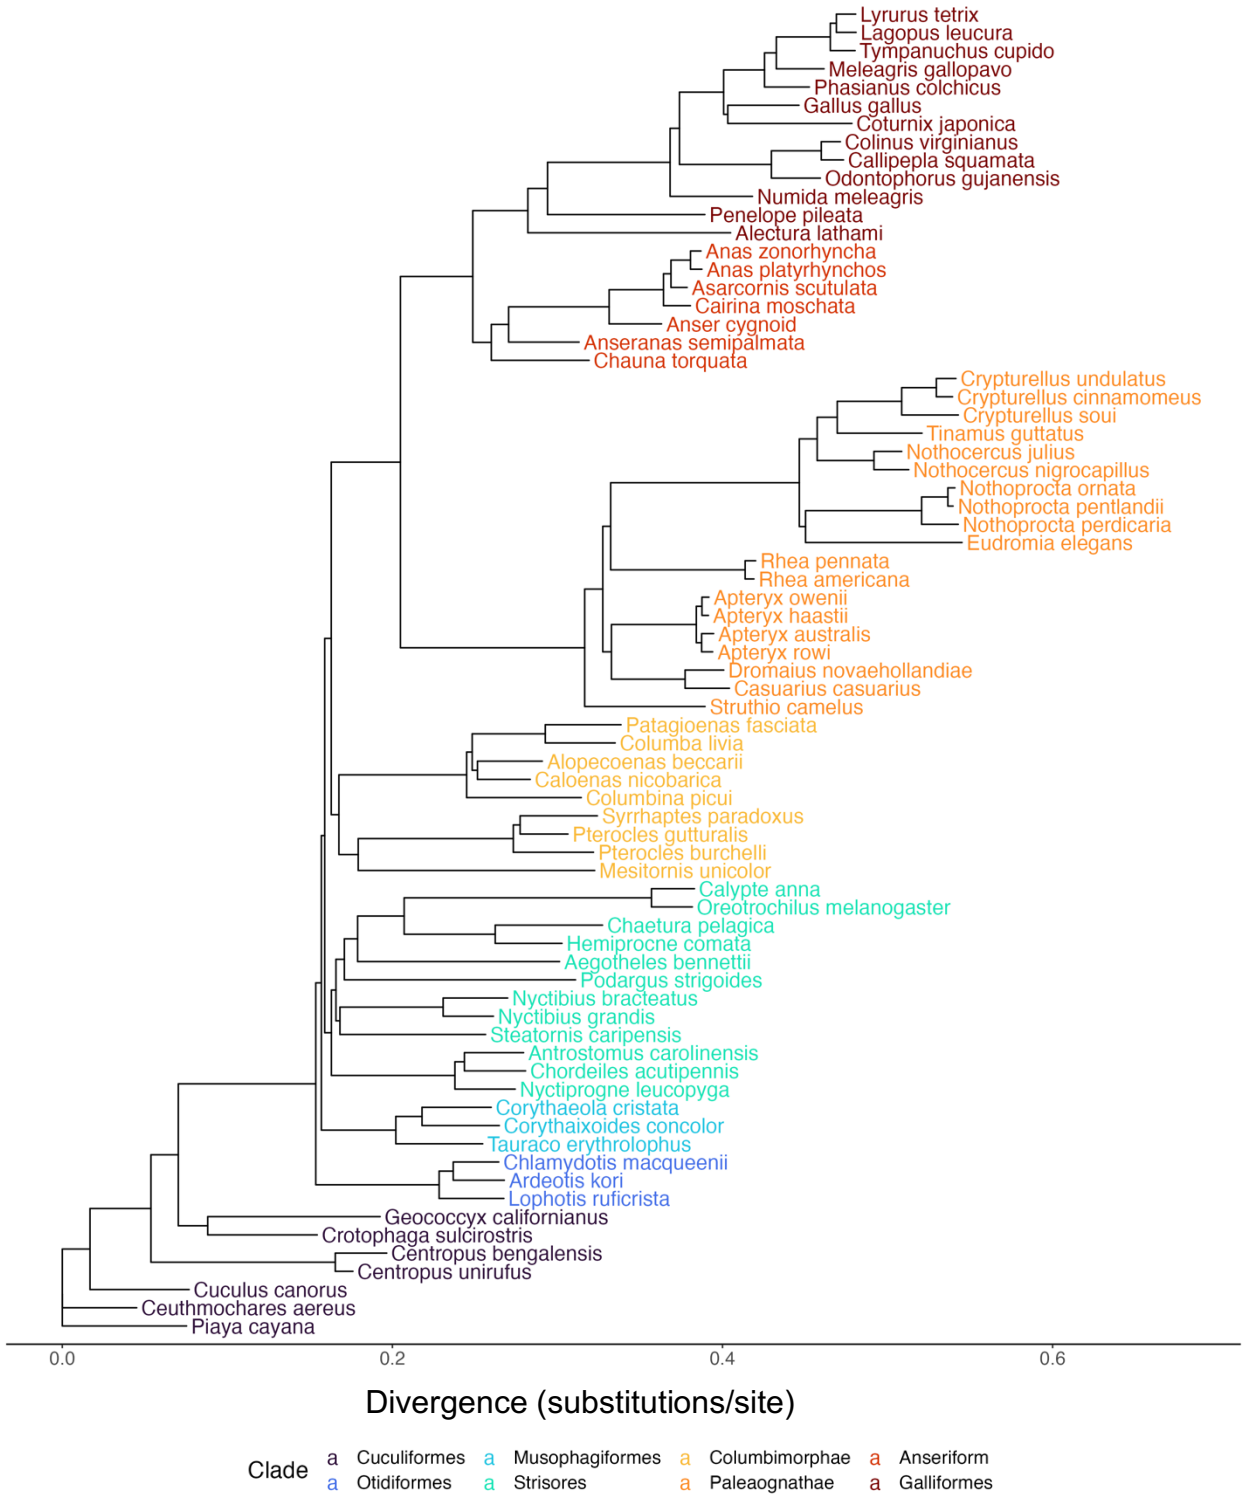

159 **Supplementary tables**

160 **Supplementary Table 1. Output of Bayesian GLMMs of lifetime mating success (LMS).**

161 Shown are point estimates, credible intervals (95% and 80%) and  $R^2$  values of the standardised  
 162 beta coefficients of the genomic predictors on LMS. Predictors included the total GERP and  
 163 SnpEff loads, the total GERP load based on mutations with GERP scores between 3 and 4, and  
 164 the homozygous and heterozygous GERP and SnpEff loads.

165

| Predictor                                | Median | 95% CI<br>(lower, upper) | 80% CI<br>(lower, upper) | Conditional<br>R <sup>2</sup> [95%CI] | Marginal R <sup>2</sup><br>[95%CI] |
|------------------------------------------|--------|--------------------------|--------------------------|---------------------------------------|------------------------------------|
| Total GERP load                          | -0.21  | -0.27, -0.14             | -0.25, -0.17             | 0.07 [0.04, 0.11]                     | 0.02 [3.64e <sup>-5</sup> , 0.06]  |
| Total SnpEff load                        | -0.11  | -0.18, -0.04             | -0.16, -0.06             | 0.05 [0.03, 0.08]                     | 0.01 [3.69e <sup>-5</sup> , 0.03]  |
| Total GERP load based on GERP scores 3-4 | -0.12  | -0.20, -0.05             | -0.17, -0.08             | 0.06 [0.03, 0.09]                     | 0.01 [6.81e <sup>-5</sup> , 0.03]  |
| Homozygous GERP load                     | -0.57  | -0.76, -0.39             | -0.70, -0.45             | 0.07 [0.04, 0.11]                     | 0.02 [1.68e <sup>-4</sup> , 0.06]  |
| Heterozygous GERP load                   | -0.60  | -0.78, -0.41             | -0.72, -0.48             |                                       |                                    |
| Homozygous SnpEff load                   | -0.04  | -0.17, -0.01             | -0.15, -0.04             | 0.05 [-.03, 0.08]                     | 0.01 [2.87e <sup>-4</sup> , 0.03]  |
| Heterozygous SnpEff load                 | -0.09  | -0.24, -0.06             | -0.21, 0.09              |                                       |                                    |

166

167

168 **Supplementary Table 2. Output of Bayesian GLMMs of lifetime mating success (LMS)**  
 169 **broken down by gene region for GERP.** Shown are point estimates, credible intervals (95%  
 170 and 80%) and  $R^2$  values of the standardised beta coefficients of the total GERP load calculated  
 171 per genomic location.

172

| <b>Region</b> | <b>Median</b> | <b>95% CI<br/>(lower, upper)</b> | <b>80% CI<br/>(lower, upper)</b> | <b>Conditional <math>R^2</math><br/>[95%CI]</b> | <b>Marginal <math>R^2</math><br/>[95%CI]</b> |
|---------------|---------------|----------------------------------|----------------------------------|-------------------------------------------------|----------------------------------------------|
| Promoter      | -0.18         | -0.26, -0.09                     | -0.23, -0.13                     | 0.07 [0.04, 0.11]                               | 0.01 [ $4.18e^{-5}$ , 0.04]                  |
| TSS           | -0.27         | -0.35, -0.20                     | -0.32, -0.22                     | 0.07 [0.04, 0.11]                               | 0.03 [ $1.00e^{-3}$ , 0.07]                  |
| Intron        | -0.29         | -0.37, -0.21                     | -0.35, -0.23                     | 0.06 [0.04, 0.09]                               | 0.03 [ $2.0e^{-3}$ , 0.06]                   |
| Exon          | 0.23          | 0.15, 0.31                       | 0.18, 0.29                       | 0.07 [0.04, 0.11]                               | 0.02 [ $3.00e^{-4}$ , 0.05]                  |

173

174

175 **Supplementary Table 3. Output of Bayesian GLMMs of lifetime mating success (LMS)**  
 176 **broken down by gene region for SnpEff.** Shown are point estimates, credible intervals (95%  
 177 and 80%) and  $R^2$  values of the standardised beta coefficients of total SnpEff load calculated  
 178 per genomic location.

179

| <b>Region</b> | <b>Median</b> | <b>95% CI<br/>(lower, upper)</b> | <b>80% CI<br/>(lower, upper)</b> | <b>Conditional <math>R^2</math><br/>[95%CI]</b> | <b>Marginal <math>R^2</math><br/>[95%CI]</b> |
|---------------|---------------|----------------------------------|----------------------------------|-------------------------------------------------|----------------------------------------------|
| Promoter      | -0.26         | -0.34, -0.18                     | -0.31, -0.20                     | 0.06 [0.04, 0.10]                               | 0.02 [ $1.00e^{-3}$ , 0.06]                  |
| TSS           | -0.04         | -0.12, 0.04                      | -0.09, 0.01                      | 0.05 [0.03, 0.09]                               | 0.05 [ $1.56e^{-5}$ , 0.02]                  |
| Intron        | -0.08         | -0.15, 0.01                      | -0.13, -0.02                     | 0.05 [0.03, 0.08]                               | 0.01 [ $8.93e^{-5}$ , 0.03]                  |
| Exon          | -0.06         | -0.20, -0.03                     | -0.17, -0.06                     | 0.05 [0.03, 0.08]                               | 0.01 [ $6.60e^{-6}$ , 0.03]                  |

180

181 **Supplementary Table 4. Output of Bayesian GLMMs of annual mating success (AMS).**  
 182 Shown are point estimates, credible intervals (95% and 80%) and  $R^2$  of the standardised beta  
 183 coefficients of the six sexual traits, total load, and age category.

184

| Approach | Predictor               | Median | 95% CI<br>(lower,<br>upper) | 80% CI<br>(lower,<br>upper) | Conditional<br>$R^2$ [95%CI] | Marginal $R^2$<br>[95%CI] |
|----------|-------------------------|--------|-----------------------------|-----------------------------|------------------------------|---------------------------|
| GERP     | Lyre size               | 0.31   | -0.07,<br>0.69              | 0.07, 0.57                  | 0.55 [0.40,<br>0.69]         | 0.11 [0.02,<br>0.26]      |
|          | Eye comb size           | 0.13   | -0.21,<br>0.48              | -0.10,<br>0.35              |                              |                           |
|          | Blue chroma             | 0.15   | -0.05,<br>0.36              | 0.01, 0.29                  |                              |                           |
|          | Attendance              | 1.32   | 0.71, 2.01                  | 0.91, 1.74                  |                              |                           |
|          | Fighting rate           | -0.06  | -0.33,<br>0.21              | -0.24,<br>0.11              |                              |                           |
|          | Centrality              | -0.59  | -0.93, -<br>0.23            | -0.81, -<br>0.36            |                              |                           |
|          | Total load              | -0.12  | -0.38,<br>0.11              | -0.28, -<br>0.03            |                              |                           |
|          | Age category - yearling | -0.17  | -1.09,<br>0.74              | -0.78,<br>0.42              |                              |                           |
| SnpEff   | Lyre size               | 0.33   | -0.08,<br>0.72              | 0.07, 0.58                  | 0.55 [0.41,<br>0.68]         | 0.10 [0.02,<br>0.25]      |
|          | Eye comb size           | 0.14   | -0.21,<br>0.49              | -0.09,<br>0.37              |                              |                           |
|          | Blue chroma             | 0.15   | -0.06,<br>0.36              | 0.02, 0.29                  |                              |                           |
|          | Attendance              | 1.32   | 0.72, 1.94                  | 0.92, 1.73                  |                              |                           |
|          | Fighting rate           | -0.06  | -0.32,<br>0.20              | -0.23,<br>0.11              |                              |                           |
|          | Centrality              | -0.57  | -0.94, -<br>0.22            | -0.82, -<br>0.34            |                              |                           |
|          | Total load              | -0.11  | -0.38,<br>0.16              | -0.27,<br>0.06              |                              |                           |
|          | Age category - yearling | -0.15  | -1.04,<br>0.79              | -0.73,<br>0.45              |                              |                           |

185

186

187 **Supplementary Table 5. Output of Bayesian GLMMs of the six sexual traits.** Shown are  
 188 point estimates, credible intervals (95% and 80%) and  $R^2$  values of the standardised beta  
 189 coefficients of total GERP load and age category. One model was constructed for each of the  
 190 sexual traits (see Methods for details).

191

| Response      | Predictor       | Median              | 95% CI<br>(lower,<br>upper) | 80% CI<br>(lower,<br>upper) | Conditional R <sup>2</sup><br>[95%CI] | Marginal R <sup>2</sup><br>[95%CI] |
|---------------|-----------------|---------------------|-----------------------------|-----------------------------|---------------------------------------|------------------------------------|
| Lyre size     | Total GERP load | -0.03               | -0.10, 0.04                 | -0.07, 0.02                 | 0.88 [0.86, 0.89]                     | 0.74 [0.72, 0.75]                  |
|               | Age yearling -  | -1.77               | -1.86, -1.68                | -1.82, -1.72                |                                       |                                    |
| Eye comb size | Total GERP load | -3.3e <sup>-3</sup> | -0.09, 0.09                 | -0.06, 0.05                 | 0.57 [0.49, 0.63]                     | 0.40 [0.34, 0.45]                  |
|               | Age yearling -  | -1.31               | -1.47, -1.16                | -1.41, -1.21                |                                       |                                    |
| Blue chroma   | Total GERP load | -0.03               | -0.13, 0.08                 | -0.10, 0.04                 | 0.42 [0.32, 0.50]                     | 0.10 [0.06, 0.15]                  |
|               | Age yearling -  | -0.67               | -0.85, -0.49                | -0.79, -0.55                |                                       |                                    |
| Attendance    | Total GERP load | -0.10               | -0.19, -0.01                | -0.16, -0.05                | 0.42 [0.33, 0.50]                     | 0.33 [0.27, 0.39]                  |
|               | Age yearling -  | -1.15               | -1.31, -0.99                | -1.26, -1.05                |                                       |                                    |
| Fighting rate | Total GERP load | 0.01                | -0.09, 0.12                 | -0.06, 0.08                 | 0.18 [0.09, 0.30]                     | 0.07 [0.02, 0.12]                  |
|               | Age yearling -  | -0.60               | -0.83, -0.37                | -0.75, -0.44                |                                       |                                    |
| Centrality    | Total GERP load | 0.04                | -0.09, 0.16                 | -0.04, 0.12                 | 0.44 [0.32, 0.55]                     | 0.08 [0.03, 0.13]                  |
|               | Age yearling -  | 0.62                | 0.40, 0.84                  | 0.48, 0.76                  |                                       |                                    |

192 **Supplementary Table 6. Output of Bayesian GLMMs of the six sexual traits.** Shown are  
 193 point estimates, credible intervals (95% and 80%) and  $R^2$  values of the standardised beta  
 194 coefficients of total SnpEff load and age category. One model was constructed for each of the  
 195 sexual traits (see Methods for details).

196

| Response      | Predictor         | Median | 95% CI<br>(lower,<br>upper) | 80% CI<br>(lower,<br>upper) | Conditional R <sup>2</sup><br>[95%CI] | Marginal R <sup>2</sup><br>[95%CI] |
|---------------|-------------------|--------|-----------------------------|-----------------------------|---------------------------------------|------------------------------------|
| Lyre size     | Total SnpEff load | 0.04   | -0.04, 0.10                 | -0.01, 0.08                 | 0.88 [0.86, 0.89]                     | 0.73 [0.72, 0.75]                  |
|               | Age yearling -    | -1.77  | -1.84, -1.69                | -1.82, -1.72                |                                       |                                    |
| Eye comb size | Total SnpEff load | -0.01  | -0.10, 0.07                 | -0.07, 0.04                 | 0.57 [0.50, 0.63]                     | 0.40 [0.35, 0.45]                  |
|               | Age yearling -    | -1.31  | -1.46, -1.15                | -1.41, -1.21                |                                       |                                    |
| Blue chroma   | Total SnpEff load | -0.07  | -0.17, 0.04                 | -0.13, 9.80e <sup>-4</sup>  | 0.42 [0.33, 0.50]                     | 0.11 [0.06, 0.15]                  |
|               | Age yearling -    | -0.67  | -0.84, -0.49                | -0.79, -0.55                |                                       |                                    |
| Attendance    | Total SnpEff load | -0.03  | -0.11, 0.06                 | -0.08, 0.03                 | 0.43 [0.34, 0.51]                     | 0.32 [0.26, 0.38]                  |
|               | Age yearling -    | -0.17  | -1.32, -0.99                | -1.27, -1.06                |                                       |                                    |
| Fighting rate | Total SnpEff load | -0.02  | -0.12, 0.08                 | -0.09, 0.04                 | 0.18 [0.09, 0.29]                     | 0.07 [0.02, 0.12]                  |
|               | Age yearling -    | -0.58  | -0.82, -0.36                | -0.74, -0.43                |                                       |                                    |
| Centrality    | Total SnpEff load | -0.01  | -0.14, 0.11                 | -0.09, 0.07                 | 0.45 [0.32, 0.55]                     | 0.08 [0.03, 0.12]                  |
|               | Age yearling -    | 0.62   | 0.40, 0.84                  | 0.48, 0.76                  |                                       |                                    |

197

198 **Supplementary Table 7. Output of Bayesian GLMMs for the direct and indirect effects of**  
199 **total load on AMS.** Shown are point estimates and credible intervals (95% and 80%) of the  
200 standardised beta coefficients of the direct and indirect effects of total load on AMS through  
201 the six sexual traits calculated using the Point Method (see Methods for details). The direct  
202 effect of total GERP load on AMS was estimated by correcting for all the sexual traits.

203

| <b>Approach</b> | <b>Effect</b> | <b>Mediator</b> | <b>Median</b> | <b>95% CI (lower, upper)</b> | <b>80% CI (lower, upper)</b> |
|-----------------|---------------|-----------------|---------------|------------------------------|------------------------------|
| <b>GERP</b>     | Direct        | -               | -0.13         | -0.36, 0.11                  | -0.29, 0.03                  |
|                 | Indirect      | Lyre size       | -0.01         | -0.04, 0.01                  | -0.03, 0.01                  |
|                 |               | Eye comb size   | 0.00          | -0.02, 0.02                  | -0.01, 0.01                  |
|                 |               | Blue chroma     | 0.00          | -0.03, 0.01                  | -0.02, 0.01                  |
|                 |               | Attendance      | -0.13         | -0.28, -0.01                 | -0.22, -0.05                 |
|                 |               | Fighting rate   | 0.00          | -0.02, 0.02                  | -0.01, 0.01                  |
|                 |               | Centrality      | -0.02         | -0.11, 0.05                  | -0.07, 0.02                  |
| <b>SnPEff</b>   | Direct        | -               | -0.11         | -0.38, 0.16                  | -0.27, 0.06                  |
|                 | Indirect      | Lyre size       | 0.01          | -0.01, 0.05                  | 0.00, 0.03                   |
|                 |               | Eye comb size   | 0.00          | -0.03, 0.02                  | -0.01, 0.01                  |
|                 |               | Blue chroma     | -0.01         | -0.04, 0.01                  | -0.03, 0.00                  |
|                 |               | Attendance      | -0.03         | -0.16, 0.09                  | -0.11, 0.04                  |
|                 |               | Fighting rate   | 0.00          | -0.01, 0.02                  | -0.01, 0.01                  |
|                 |               | Centrality      | 0.01          | -0.06, 0.09                  | -0.04, 0.06                  |

204 **Supplementary Table 8. Output of frequentist linear models of mutation load.** Shown are  
 205 beta estimates, standard errors, *t*-values and *p*-values. Lekking site was used as a predictor,  
 206 where Kummunsuo was the reference lek.

207

| Response             | Lekking site | Beta estimate | Standard error | <i>t</i> -value | <i>p</i> -value |
|----------------------|--------------|---------------|----------------|-----------------|-----------------|
| Total GERP<br>load   | Lehtusuo     | -8.57 e-5     | 1.17 e-4       | -0.73           | 0.47            |
|                      | Nyrölä       | -5.35 e-5     | 9.71 e-5       | -0.55           | 0.58            |
|                      | Saarisuo     | -5.70 e-5     | 1.20 e-4       | -0.48           | 0.64            |
|                      | Teerisuo     | 4.85 e-5      | 1.34 e-4       | 0.36            | 0.72            |
| Total SnpEff<br>load | Lehtusuo     | -1.09 e-4     | 6.66 e-4       | -0.16           | 0.87            |
|                      | Nyrölä       | -1.79 e-4     | 5.52 e-4       | -0.32           | 0.74            |
|                      | Saarisuo     | -9.17 e-4     | 6.82 e-4       | -1.34           | 0.18            |
|                      | Teerisuo     | -5.43 e-4     | 7.60 e-4       | -0.72           | 0.48            |

208

209

210 **Supplementary Table 9. Population differentiation among lekking sites.** Shown above the  
 211 diagonal are mean  $F_{ST}$  values and corresponding  $p$ -values are shown below the diagonal for  
 212 each pairwise comparison.

213

| Lekking site     | Kummunsoa | Lehtusuo | Nyrölä | Saarisuo | Teerisuo |
|------------------|-----------|----------|--------|----------|----------|
| <b>Kummunsoa</b> | -         | 0.012    | 0.017  | 0.014    | 0.016    |
| <b>Lehtusuo</b>  | 0.512     | -        | 0.014  | 0.009    | 0.009    |
| <b>Nyrölä</b>    | 0.527     | 0.457    | -      | 0.017    | 0.017    |
| <b>Saarisuo</b>  | 0.500     | 0.524    | 0.501  | -        | 0.013    |
| <b>Teerisuo</b>  | 0.488     | 0.506    | 0.536  | 0.527    | -        |

214

215

216 **Supplementary Table 10. Summary statistics of the B10k and the scaffolded black grouse**  
217 **reference genome.**

218

| <b>Statistic</b>           | <b>B10k genome</b> | <b>Scaffolded genome</b> |
|----------------------------|--------------------|--------------------------|
| Total length (bp)          | 1,002,957,384      | 1,003,452,484            |
| N50                        | 5,658,217          | 69,550,540               |
| L50                        | 49                 | 5                        |
| N90                        | 500,392            | 12,704,504               |
| L90                        | 267                | 18                       |
| Number of scaffolds        | 26,930             | 21,979                   |
| Number of scaffolds > 1kbp | 10,613             | 5,662                    |
| Largest scaffold (bp)      | 32,946,576         | 189,864,486              |
| Number of gaps             | 10,955             | 15,906                   |

219

220

## 221 **References**

222

- 223 1. Höglund, J., Alatalo, R. V., Lundberg, A., Rintamäki, P. T. & Lindell, J. Microsatellite  
224 markers reveal the potential for kin selection on black grouse leks. *Proc. R. Soc. Lond. B*  
225 *Biol. Sci.* **266**, 813–816 (1999).
- 226 2. Chen, R. S. *et al.* Effects of hunting on genetic diversity, inbreeding and dispersal in  
227 Finnish black grouse (*Lyrurus tetrix*). *Evol. Appl.* **16**, 625–637 (2023).
- 228 3. Corrales, C. & Höglund, J. Maintenance of gene flow by female-biased dispersal of Black  
229 Grouse *Tetrao tetrix* in northern Sweden. *J. Ornithol.* **153**, 1127–1139 (2012).
- 230 4. Caizergues, A. & Ellison, L. N. Natal dispersal and its consequences in Black Grouse  
231 *Tetrao tetrix*: Natal dispersal and its consequences in Black Grouse. *Ibis* **144**, 478–487  
232 (2002).
- 233 5. Warren, P. K. & Baines, D. Dispersal, survival and causes of mortality in black grouse  
234 *Tetrao tetrix* in northern England. *Wildl. Biol.* **8**, 91–97 (2002).
- 235 6. Manichaikul, A. *et al.* Robust relationship inference in genome-wide association studies.  
236 *Bioinformatics* **26**, 2867–2873 (2010).
- 237 7. Lebigre, C., Alatalo, R. V., Forss, H. E. & Siitari, H. Low levels of relatedness on black  
238 grouse leks despite male philopatry. *Mol. Ecol.* **17**, 4512–4521 (2008).
- 239 8. Lebigre, C., Alatalo, R. V. & Siitari, H. Female-biased dispersal alone can reduce the  
240 occurrence of inbreeding in black grouse (*Tetrao tetrix*). *Mol. Ecol.* **19**, 1929–1939  
241 (2010).
- 242 9. Soulsbury, C. D., Alatalo, R. V., Lebigre, C., Rokka, K. & Siitari, H. Age-dependent  
243 inbreeding risk and offspring fitness costs in female black grouse. *Biol. Lett.* **7**, 853–855  
244 (2011).
- 245 10. Zhang, G. Bird sequencing project takes off. *Nature* **522**, 34–34 (2015).

- 246 11. Feng, S., Stiller, J. & Deng. Dense sampling of bird diversity increases power of  
247 comparative genomics. *Nature* **587**, 252–257 (2020).
- 248 12. Luo, R. *et al.* SOAPdenovo2: an empirically improved memory-efficient short-read de  
249 novo assembler. *GigaScience* **1**, 18 (2012).
- 250 13. Xu, M. *et al.* TGS-GapCloser: A fast and accurate gap closer for large genomes with low  
251 coverage of error-prone long reads. *GigaScience* **9**, giaa094 (2020).
- 252 14. Putnam, N. H. *et al.* Chromosome-scale shotgun assembly using an in vitro method for  
253 long-range linkage. *Genome Res.* **26**, 342–350 (2016).
- 254 15. Camacho, C. *et al.* BLAST+: architecture and applications. *BMC Bioinformatics* **10**, 421  
255 (2009).
- 256 16. Smit, A., Hubley, R. & Green, P. RepeatModeler Open. (2008).
- 257 17. Smit, A., Hubley, R. & Green, P. RepeatMasker Open. (2013).
- 258 18. Stanke, M., Diekhans, M., Baertsch, R. & Haussler, D. Using native and syntenically  
259 mapped cDNA alignments to improve *de novo* gene finding. *Bioinformatics* **24**, 637–644  
260 (2008).
- 261 19. Korf, I. Gene finding in novel genomes. *BMC Bioinformatics* **5**, 59 (2004).
- 262 20. Dobin, A. *et al.* STAR: ultrafast universal RNA-seq aligner. *Bioinformatics* **29**, 15–21  
263 (2013).
- 264 21. Cantarel, B. L. *et al.* MAKER: An easy-to-use annotation pipeline designed for emerging  
265 model organism genomes. *Genome Res.* **18**, 188–196 (2008).
- 266 22. Chan, P. P., Lin, B. Y., Mak, A. J. & Lowe, T. M. tRNAscan-SE 2.0: improved detection  
267 and functional classification of transfer RNA genes. *Nucleic Acids Res.* **49**, 9077–9096  
268 (2021).
- 269 23. Purcell, S. *et al.* PLINK: A Tool Set for Whole-Genome Association and Population-  
270 Based Linkage Analyses. *Am. J. Hum. Genet.* **81**, 559–575 (2007).

- 271 24. Wickham, H. *et al.* Welcome to the Tidyverse. *J. Open Source Softw.* **4**, 1686 (2019).
- 272 25. Danecek, P. *et al.* The variant call format and VCFtools. *Bioinformatics* **27**, 2156–2158  
273 (2011).
- 274 26. Canty, A. & Ripley, B. D. boot: Bootstrap R (S-Plus) functions. (2021).
- 275 27. Humble, E., Paijmans, A. J., Forcada, J. & Hoffman, J. I. An 85K SNP Array Uncovers  
276 Inbreeding and Cryptic Relatedness in an Antarctic Fur Seal Breeding Colony. *G3*  
277 *GenesGenomesGenetics* **10**, 2787–2799 (2020).
- 278 28. Korneliussen, T. S. & Moltke, I. NgsRelate: a software tool for estimating pairwise  
279 relatedness from next-generation sequencing data. *Bioinformatics* **btv509** (2015)  
280 doi:10.1093/bioinformatics/btv509.
- 281 29. Waples, R. K., Albrechtsen, A. & Moltke, I. Allele frequency-free inference of close  
282 familial relationships from genotypes or low-depth sequencing data. *Mol. Ecol.* **28**, 35–48  
283 (2019).
- 284
